# Supplementary material for: Unique Molecular Identifiers reveal a novel sequencing artefact with implications for RNA-Seq based gene expression analysis
Source: PubMed Central journal article supplement (PMC6120941; doi:10.1038/s41598-018-31064-7), 2018-09-03
Supplement: 41598_2018_31064_MOESM1_ESM.pdf [file 41598_2018_31064_MOESM1_ESM.pdf]

# Unique Molecular Identifiers reveal a novel sequencing artefact with implications for RNA-seq based gene expression analysis

Johnny A. Sena<sup>1</sup>, Giulia Galotto<sup>2</sup>, Nico P. Devitt<sup>1</sup>, Melanie C. Connick<sup>1</sup>, Jennifer L. Jacobi<sup>1</sup>, Pooja E. Umale<sup>1</sup>, Luis Vidali<sup>2</sup>, and Callum J. Bell<sup>1,\*</sup>

<sup>1</sup>National Center for Genome Resources, Santa Fe, NM 87505, United States

<sup>2</sup>Worcester Polytechnic Institute, Department of Biology and Biotechnology, Worcester, MA 01609, United States

\*cjb@ncgr.org

## Supplementary Methods

### Detailed Methods: Tn5 complex assembly and activity Assay

The TAG1 tagmentation oligo was order from IDT with standard desalting and 5' phosphorylation along with six barcoded tagmentation oligos, TAG2, that were ordered with standard desalting and analytical RP-HPLC (Supplementary Table S 1). Each tagmentation oligo was resuspended at 100  $\mu\text{M}$  in Nuclease-free Duplex Buffer (IDT 11-05-01-12). Each of the six barcoded TAG2 oligos were mixed with equimolar amounts of TAG1 and incubated at 94°C in a thermocycler for two minutes to denature the oligos. The six oligo mixtures were removed from the thermocycler and placed on the benchtop for 30 minutes to anneal the TAG1 and TAG2 oligos and to form six uniquely barcoded hetero-duplexes. For each of the six hetero-duplexes, 11.94  $\mu\text{l}$  of duplex (6.26  $\mu\text{M}$ ) was mixed with 24  $\mu\text{l}$  of dialysis buffer, 80  $\mu\text{l}$  of glycerol (42%), 72  $\mu\text{l}$  of Tn5 transposase (0.7  $\mu\text{g}/\mu\text{l}$ ) and 3.06  $\mu\text{l}$  of nuclease-free H<sub>2</sub>O to make six uniquely barcoded transpososome assemblies. The transpososome assemblies were stored at -20 °C until tested for transposase activity.

To test the transposomes for transposase activity, the pDONR-222 (100 ng/ $\mu\text{l}$ ) (Thermo Fisher Scientific -CloneMiner™ II cDNA Library Construction Kit A11180) or pUC19 (100 ng/ $\mu\text{l}$ ) (Thermo Fisher Scientific SD0061) plasmid was linearized by PstI-HF (40 units) restriction digestion (New England Biolabs R3140S). The digested plasmid was loaded in a 1% TAE agarose gel and run for 45 minutes, stained with a 0.4 ng/ $\mu\text{l}$  ethidium bromide/H<sub>2</sub>O solution for 20 minutes and de-stained with distilled H<sub>2</sub>O for 15 minutes. The gel was imaged on a Bio-rad Gel Doc XR+ imaging system with Image Lab Software v.5.2.1. to confirm plasmid linearization. Next 100 ng of plasmid was mixed with 2  $\mu\text{l}$  of each uniquely barcoded transposome assembly, 4  $\mu\text{l}$  of tagmentation buffer (50mM TAPS-NaOH pH 8.5 (Sigma T130-25G), 25mM MgCl<sub>2</sub> (Ambion Am9530G), and 40% PEG 8000 (Sigma 83271-500ml-F)), and 13  $\mu\text{l}$  of H<sub>2</sub>O. The mixtures were incubated in a thermocycler at 55 °C for seven minutes and then place on ice. 0.5  $\mu\text{l}$  of proteinase K (0.49  $\mu\text{g}/\mu\text{l}$ ) (Ambion AM2546) was added to the plasmid/tagmentation mixtures and incubated at 55 °C for seven minutes to inactivate the transposomes. The tagmented plasmids were run in 1% TAE agarose gel as described above to assess tagmentation efficiency. The transposomes displayed 100 % efficiency by completely fragmenting the linearized plasmid as indicated by a smear in the agarose gel. Functional transposomes were then used for Illumina library preparation as indicated below.

### Detailed Methods: RNA preparation, reverse transcription and PCR

For run\_170420 and run\_171108, total RNA was extracted from *P. patens* as described above and serially diluted to 25 pg/ $\mu\text{l}$  for 1 cell equivalents and 250 pg/ $\mu\text{l}$  for 10 cell equivalents. 1  $\mu\text{l}$  of the diluted RNA was resuspended in 9  $\mu\text{l}$  RNase free water and 0.56  $\mu\text{l}$  of Takara RNase Inhibitor (Takara cat. 2313A) was added. The RNA was freeze-thawed three times at -80 °C and room temperature, respectively, to mimic the lysis conditions used for single protoplasts. Six technical replicates were processed at a time, three 1 cell equivalents and three 10 cell equivalents.

For run\_171108, six individual protoplasts were harvested as described above in 5  $\mu\text{l}$  of Hank's Balanced Salt Solution (HBSS) and 0.56  $\mu\text{l}$  of Takara RNase Inhibitor was added. The protoplasts were lysed by freezing and thawing three times at -80 °C and room temperature, respectively. Following the freeze-thaw cycles, the RNA and protoplasts were placed on ice.

For RT, 8.2  $\mu\text{l}$  of RNA or protoplast lysate was mixed with 1.8  $\mu\text{l}$  of 10  $\mu\text{M}$  template switching RNA oligo, TSO3 (Supplementary Table S 1), in 200  $\mu\text{l}$  PCR tubes. The mixtures were incubated in a thermocycler at 72°C with a heated lid for three minutes and then slow ramped to 42°C at 0.1°C/second. Once the mixture reached 42°C, the temperature was held for two minutes.

During the slow ramp incubation, an RT master mix was set up in a 200  $\mu\text{l}$  PCR tube with the following reagents, 28.8  $\mu\text{l}$  of 5X SuperScript II First Strand Buffer (Thermo Scientific 18064014), 17.28  $\mu\text{l}$  of 25 mM MgCl<sub>2</sub> (Thermo Scientific AB0359), 21.6  $\mu\text{l}$  of dNTP mix 10 mM each (Invitrogen 18427013), 5.76  $\mu\text{l}$  of 0.1 M DTT (Invitrogen 18064014), 12.96  $\mu\text{l}$

of 200 U $\mu$ l SuperScript II reverse transcriptase (Invitrogen 18064014), and 5.76  $\mu$ l of 100  $\mu$ M FSP primer (Supplementary Table S 1). After the RNA/TSO3 mixture was incubated for two minutes at 42°C, the RT master mix was also placed on the thermocycler and incubated at 42°C for an additional minute. Next, 10  $\mu$ l of RT master mix was added to each of the replicate RNA/TSO3 mixtures and mixed by pipetting. The RT reactions were incubated at 42°C for 90 minutes. Then, the RT reactions were incubated at 70°C for 10 minutes to inactivate the RT enzyme. The RT reactions were stored overnight at -20°C.

The following day, RT reactions were thawed on ice and used for PCR optimization. For each replicate, a 10  $\mu$ l aliquot of cDNA was mixed with 2.5  $\mu$ l of 10X Advantage 2 PCR buffer (Takara 639201), 1.1  $\mu$ l dNTP mix 10 mM each (Invitrogen 18427013), 1.3  $\mu$ l of 10  $\mu$ M MODIPCR primer (Supplementary Table S 1), 9.1  $\mu$ l of nuclease free H<sub>2</sub>O, and 1  $\mu$ l of 50X Advantage 2 polymerase mix (Takara 639201). The PCR reactions were placed in a thermocycler with a heated lid and run with the following cycling parameters: Step 1: 95°C for two minutes, Step 2: 98°C for 30 seconds, Step 3: 60°C for 20 seconds, Step 4: 70°C for four minutes, Step 5: Repeat Steps 2-4 for 28 cycles, Step 6: 70°C for five minutes, and Step 7: hold at 4°C. During Step 4, at cycles 21, 23, 25, 27, and 29, 5  $\mu$ l aliquots were collected and placed on ice. The aliquots were placed back on the thermocycler at Step 6 for a final extension step. The PCR aliquots for each replicate were run in a 1% TAE agarose gel, stained with a 0.4 ng/ $\mu$ l ethidium bromide/H<sub>2</sub>O solution for 20 minutes and de-stained with distilled H<sub>2</sub>O for 15 minutes. The gel was imaged on a Bio-rad Gel Doc XR+ imaging system with Image Lab Software v.5.2.1. From the gel images, 27 cycles was determined to be the optimal number of PCR cycles for purified RNA and protoplasts.

Following PCR optimization, the remaining cDNA for each replicate, 10  $\mu$ l each, was used to repeat the PCR reactions described above. The cycling parameters were also repeated as described above but with 27 PCR cycles and without collecting aliquots. The PCR reactions were cleaned by adding 17.5  $\mu$ l of AmPure XP beads (Beckman Coulter A63881) to each 25  $\mu$ l PCR reaction. The PCR/bead slurry was mixed until homogeneous by pipetting or gentle flicking of the PCR tubes. The slurry tubes were centrifuged briefly to collect droplets and were incubated at room temperature for five minutes. Following incubation, the PCR tubes containing the slurry were placed on a DyaMag-96 side magnet (ThermoFisher Scientific 12331D) for five minutes until the supernatant was clear. While on the magnet, the cleared supernatant was discarded, 200  $\mu$ l of 80% ethanol was added to the beads, and incubated on the magnet for 30 seconds. The ethanol was discarded and the beads were washed a second time with 80% ethanol, as described above. The ethanol was discarded and the PCR tubes were centrifuged briefly to collect residual ethanol. The tubes were placed back on the magnet and the residual ethanol was removed by pipetting. The tubes were left on the magnet for 7-15 minutes with the caps open until the beads were completely dry. The tubes were removed from the magnet. The beads were resuspended in 14  $\mu$ l of EB buffer (Qiagen 19086) and mixed until homogeneous. The EB/bead slurries were incubated at room temperature for five minutes to elute the PCR product and then placed back on the magnet for two minutes until the supernatant was clear. 12  $\mu$ l of cleared supernatant was transferred to new 200  $\mu$ l PCR tubes.

1  $\mu$ l of PCR product for each replicate was quantified, as specified by the manufacturer, using a Qubit DNA High Sensitivity Assay Kit (ThermoFisher Scientific Q32851) and the Qubit3.0 fluorometer (ThermoFisher Scientific Q33216). To assess the size distribution of the libraries, 1  $\mu$ l of each library was run on a 2100 Bioanalyzer (Agilent G2939A) using a High Sensitivity DNA Analysis kit (Agilent 5067-4626) as specified by the manufacturers' instructions. The size distribution of the libraries ranged from 200-1000 bps. The libraries were stored overnight at -20°C.

### **Detailed Methods: Tagmentation and library amplification.**

The following day, the PCR product was thawed on ice. The PCR product was simultaneously fragmented and barcoded using Tn5 DNA transposase to transfer adaptors to the target DNA. For each replicate, 10  $\mu$ l of PCR product was mixed with 4  $\mu$ l of tagmentation buffer (50mM TAPS-NaOH pH 8.5 (Sigma T130-25G), 25mM MgCl<sub>2</sub> (Ambion Am9530G), and 40% PEG 8000 (Sigma 83271-500ml-F) in nuclease free H<sub>2</sub>O), 2  $\mu$ l of 10X Tn5 assembly, with each replicate receiving an assembly containing a uniquely barcoded adapter, and 4  $\mu$ l of nuclease free H<sub>2</sub>O in 200  $\mu$ l PCR tubes. The reactions were incubated in a thermocycler at 55°C for seven minutes and then transferred to ice. 0.5  $\mu$ l of 20 mg/ml proteinase K (Ambion AM2546) was added to each reaction. The reactions were mixed by gently flicking the tubes and centrifuged briefly to collect droplets. The samples were placed back in a thermocycler and incubated at 55°C for seven minutes and then placed on ice.

For six replicates, 120  $\mu$ l of Dynabeads M-280 Streptavidin beads (Invitrogen 11206D) were pipetted into a 1.5 ml LoBind Eppendorf tube and placed on a DyanMag-2 magnet (ThermoFisher Scientific 12321D) until the supernatant cleared. The supernatant was discarded by pipetting. The tube was removed from the magnet and 120  $\mu$ l of BWT (10 mM Tris-HCl, pH 7.5 (Invitrogen 15567-027)), 1 mM EDTA (Ambion AM9260G), 2 M NaCl (Ambion AM9760G), 0.02% Tween-20 (Sigma P9416-50ML)) was added to the beads and mixed by pipetting until the mixture was homogeneous. The bead slurry was placed back on the magnet until the supernatant cleared and the supernatant was discarded. The beads were removed from the magnet and were resuspended in 120 of BWT.

20  $\mu$ l of washed Dynabeads M-280 Streptavidin beads were added to each 20  $\mu$ l tagmentation reaction. The bead slurries were mixed by gently flicking the PCR tubes and centrifuged briefly to collect droplets. Then, the bead slurries were rotated at room temperature for 10 minutes to allow the tagmentation libraries to bind to the beads. The bead slurries were centrifuged

briefly to collect droplets and placed on a DyaMag-96 side magnet for five minutes until the supernatant cleared. The supernatant was discarded and the PCR tubes were removed from the magnet. Then, the beads were resuspended in 100  $\mu$ l of PB buffer (Qiagen 19066) and mixed by pipetting. The bead slurry was placed on a DyaMag-96 side magnet until the supernatant cleared. The supernatant was discarded. The bead containing tubes were removed from the magnet and the beads were resuspended in 100  $\mu$ l of TNT buffer (20 mM Tris-HCl, pH 7.5 (Invitrogen 15567-027)), 50 mM NaCl (Ambion AM9760G), 0.02% Tween-20 (Sigma P9416-50ML)) and mixed by pipetting. The bead slurry was placed back on the magnet for five minutes until the supernatant cleared. The supernatant was discarded and the TNT wash was repeated again.

This time, the beads were resuspended in 100  $\mu$ l of restriction mix (1X NEB Buffer 4 (New England Biolabs B7004S) and 0.4 U/ $\mu$ l PvuI-HF (New England Biolabs R3150S) in H<sub>2</sub>O) and mixed by pipetting. The bead slurry was placed in a thermocycler and incubated at 37°C for one hour to digest and remove unwanted 3' fragments carrying the PvuI recognition site. After incubation, the bead slurry was placed on a DyaMag-96 side magnet until the supernatant cleared. The supernatant was discarded and the beads were washed three times with TNT as described above. After the third TNT wash, the beads were resuspended in 20  $\mu$ l of EB buffer. The eluted tagmentation library was placed on ice.

Next, the tagmentation libraries were amplified by PCR to obtain enough library for Illumina sequencing. For each replicate, 20  $\mu$ l of tagmentation library was mixed with 5  $\mu$ l of 10X Advantage 2 PCR buffer (Takara 639201), 1  $\mu$ l dNTP mix 10 mM each (Invitrogen 18427013), 0.5  $\mu$ l of 10  $\mu$ M P5 primer (Supplementary Table S 1), 0.5  $\mu$ l of 10  $\mu$ M P7 primer (Supplementary Table S 1), 22  $\mu$ l of nuclease free H<sub>2</sub>O, and 1  $\mu$ l of 50X Advantage 2 polymerase mix (Takara 639201). The PCR reactions were placed in a thermocycler with a heated lid and run with the following cycling parameters: Step 1: 95°C for two minutes, Step 2: 98°C for 30 seconds, Step 3: 60°C for 20 seconds, Step 4: 70°C for four minutes, Step 5: Repeat Steps 2-4 for 9 cycles, Step 6: 70°C for five minutes, and Step 7: hold at 4°C overnight. The following morning, the amplified libraries were removed from the thermocycler and placed at room temperature.

The amplified libraries were cleaned by adding 35  $\mu$ l of AmPure XP beads to each 50  $\mu$ l PCR reaction. The PCR/bead slurry was mixed until homogeneous by pipetting or gentle flicking of the PCR tubes. The slurry tubes were centrifuged briefly to collect droplets and were incubated at room temperature for five minutes. The PCR/bead slurries were placed on a DyaMag-96 side magnet for five minutes until the supernatant was clear. While on the magnet, the cleared supernatant was discarded by pipetting. 200  $\mu$ l of 80% ethanol was added to the beads and the beads were incubated for 30 seconds. The ethanol was discarded and the beads were washed a second time with 80% ethanol, as described above. The PCR tubes were centrifuged briefly to collect residual ethanol and placed back on the magnet. The residual ethanol was removed by pipetting. The tubes were left on the magnet for 7-15 minutes with the caps open until the beads were completely dry. The tubes were removed from the magnet and were resuspended in 14  $\mu$ l of EB buffer and mixed until homogeneous. The EB/bead slurries were incubated at room temperature for five minutes to elute the libraries and then placed back on the magnet for two minutes until the supernatant was clear. 12  $\mu$ l of cleared supernatant was transferred to new 200  $\mu$ l PCR tubes.

1  $\mu$ l of each library was quantified using a Qubit DNA High Sensitivity Assay Kit and the Qubit3.0 fluorometer, as specified by the manufacturer. To assess the size distribution of the libraries, 1  $\mu$ l of each library was run on a 2100 Bioanalyzer using a High Sensitivity DNA Analysis kit (see manufacturers' instructions). The size distribution of the libraries ranged from 200-700 bps. The libraries were stored at -20°C until used for sequencing.

| Oligo Name | Sequence                                                                                                                          |
|------------|-----------------------------------------------------------------------------------------------------------------------------------|
| FSP        | AAT GAT ACG GCG ACC ACC GAT CGT TTT TTT TTT TTT TTT TTT TTT TTT TTT                                                               |
| P5         | AAT GAT ACG GCG ACC ACC GA                                                                                                        |
| P7         | CAA GCA GAA GAC GGC ATA CGA GAT                                                                                                   |
| TAG1       | /5Phos/CTG TCT CTT ATA CAC ATC TGA CGC                                                                                            |
| TAG2-AD002 | CAA GCA GAA GAC GGC ATA CGA GAT CGA TGT AGC GTC AGA TGT GTA TAA GAG ACA G                                                         |
| TAG2-AD004 | CAA GCA GAA GAC GGC ATA CGA GAT TGA CCA AGC GTC AGA TGT GTA TAA GAG ACA G                                                         |
| TAG2-AD005 | CAA GCA GAA GAC GGC ATA CGA GAT ACA GTG AGC GTC AGA TGT GTA TAA GAG ACA G                                                         |
| TAG2-AD006 | CAA GCA GAA GAC GGC ATA CGA GAT GCC AAT AGC GTC AGA TGT GTA TAA GAG ACA G                                                         |
| TAG2-AD007 | CAA GCA GAA GAC GGC ATA CGA GAT CAG ATC AGC GTC AGA TGT GTA TAA GAG ACA G                                                         |
| TAG2-AD012 | CAA GCA GAA GAC GGC ATA CGA GAT CTT GTA AGC GTC AGA TGT GTA TAA GAG ACA G                                                         |
| MODRIP     | CTG TCT CTT ATA CAC ATC TGA CGC T                                                                                                 |
| MODRIP     | GCG ACC ACC GAG ATC TAC AC                                                                                                        |
| TSO3       | rArArU rGrArU rArCrG rGrCrG rArCrC rArCrC rGrArG rArUrC rUrArC rArC(N1:25252525)<br>(N1)(N1)(N1) (N1)(N1)(N1) (N1)(N1)(N1) rGrGrG |

**Table S 1.** Reverse Transcription, Tagmentation, PCR and Template Switching Oligos.

## Compute environment

Computations were done out on a server having 64 8-core CPUs (Intel Xeon E7-4830, 2.13GHz, 24 MB cache) with 1 GByte of RAM. The operating system was CentOS plus x86\_64. Bioinformatics software was installed and managed in a Bioconda ([bioconda.github.io](https://bioconda.github.io)) environment with the following packages: bamtools 2.4.0<sup>1</sup>, bcftools 1.6 (<http://www.sanger.ac.uk/science/tools/samtools-bcftools-htslib>), bedtools 2.27.0<sup>2</sup>, fastqc 0.11.5 (<https://www.bioinformatics.babraham.ac.uk/projects/fastqc>), fastx\_toolkit 0.0.14 ([http://hannonlab.cshl.edu/fastx\\_toolkit](http://hannonlab.cshl.edu/fastx_toolkit)), gmap 2017.09.30<sup>3</sup>, hisat2 2.1.0<sup>4</sup>, htlib 1.5 (<http://www.sanger.ac.uk/science/tools/samtools-bcftools-htslib>), parallel 20170422<sup>5</sup>, picard 2.14.1 (<http://broadinstitute.github.io/picard/faq.html>), samtools 1.5<sup>6</sup>, sra-tools 2.8.2 (<https://github.com/ncbi/sra-tools>), star 2.5.3a<sup>7</sup>, vcflib 1.0.0\_rc1 (<https://github.com/vcflib/vcflib>), vcfutils 0.1.14<sup>8</sup>, Rscript 3.4.1<sup>9</sup>, bioconductor-deseq2 1.18.1<sup>10</sup>. Our pipeline for fastqc manipulation, demultiplexing, quality filtering, alignment, and UMI analysis consisted of a series of shell scripts (interpreted with GNU bash version 4.1.2), Perl programs (interpreted with version 5.10.1), C programs (compiled using GCC 4.4.7) and R scripts (R 3.4.3 GUI 1.70 El Capitan build (7463)). R packages ggplot2<sup>11</sup> and dplyr<sup>12</sup> were used. This software is available and documented (including dependencies) on GitHub. DESeq2 analysis was done with modifications to a template provided by <https://gist.github.com/stephenturner/f60c1934405c127f09a6#file-deseq2-analysis-template-r-L62>

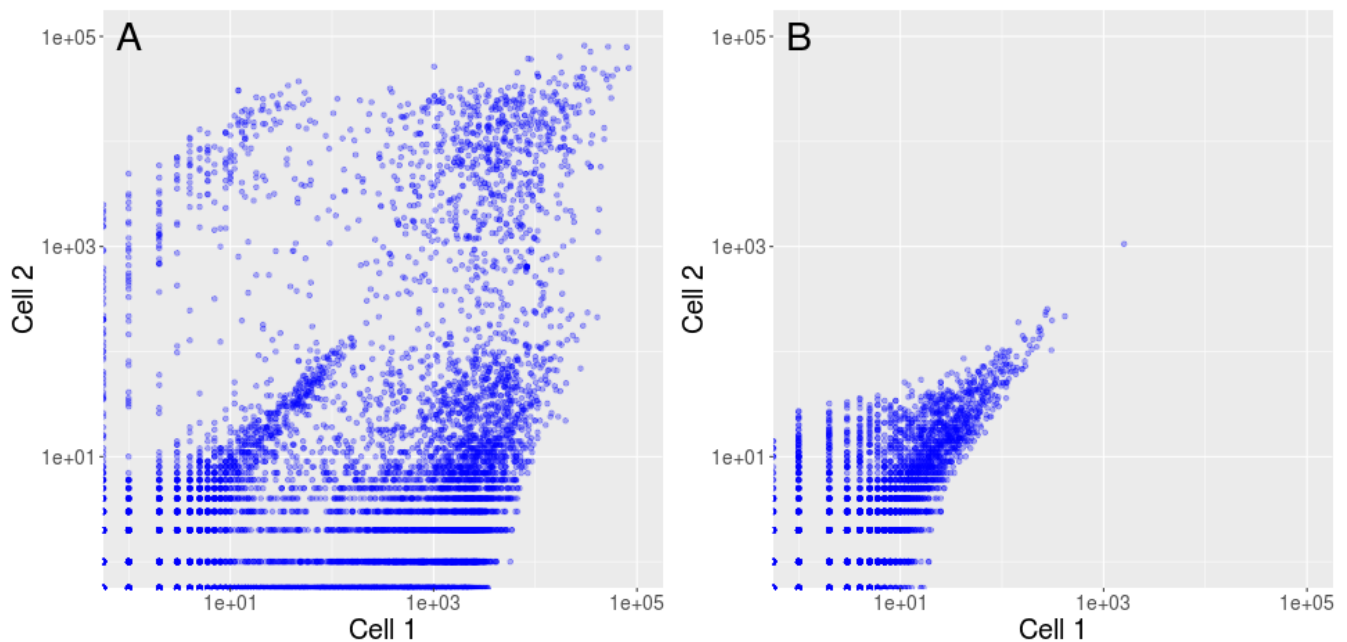

**Figure S 1.** Comparison of RNA-Seq UMI and read counts from sequencing data derived from two *P. patens* protoplasts. A: read counts per gene. B: UMI counts per gene. UMI and read counts are shown for the same data. Each dot plots a gene having two counts of reads or UMI as indicated by the X and Y axes.

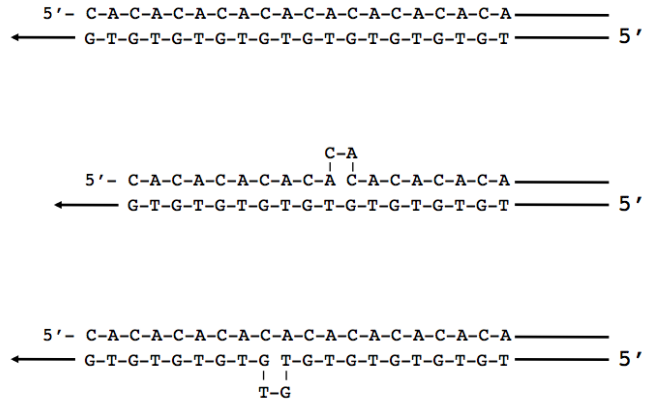

**Figure S 2.** Model of repeat-stabilized PCR stutter. Arrow indicates the direction of polymerization during a PCR cycle. The normal situation is indicated at the top, in which the template and copy strand are the same length. Slippage causing looping out of the template (center) or the copy strand (bottom) leads to products differing from the template by multiples of -2 and +2 respectively. An example of the repeat (CA)<sub>n</sub> is shown, although this may happen with any simple tandem repeat, including homopolymers.

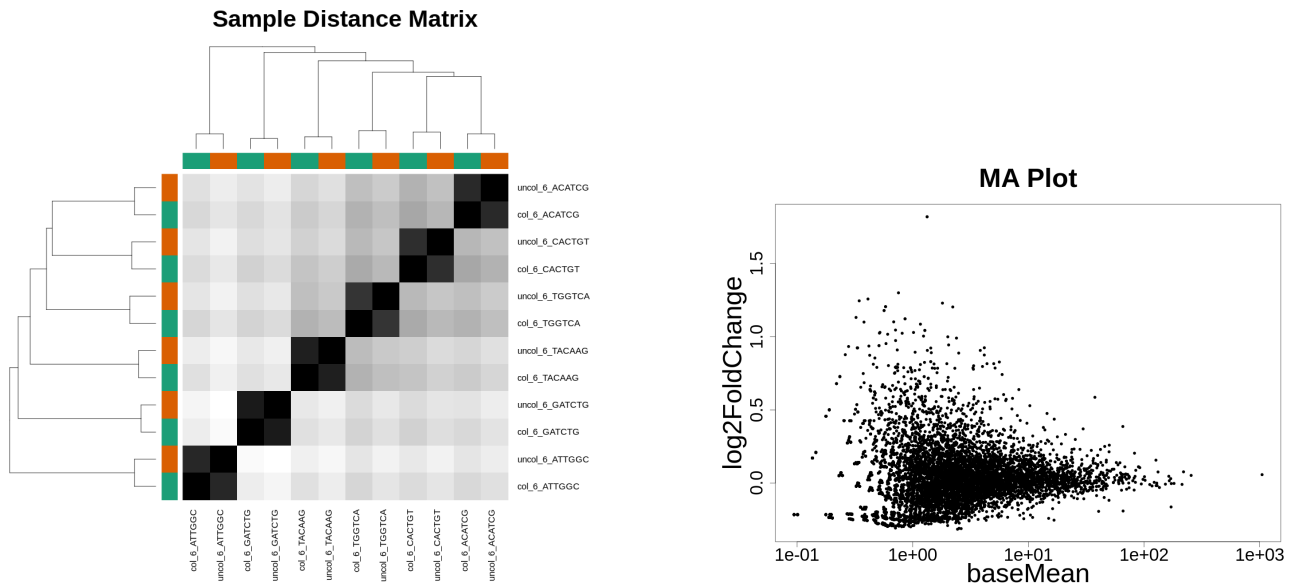

**Figure S 3.** DESeq2 analysis of six *P. patens* RNA-seq technical replicates from the run\_171108 data set in which UMI-read clusters were collapsed (col\_) or not collapsed (uncol\_) into single observations. Left: pairwise distance matrix. Right: MA plot with  $\log_2$  fold apparent expression differences on the Y axis and mean expression level on the X.

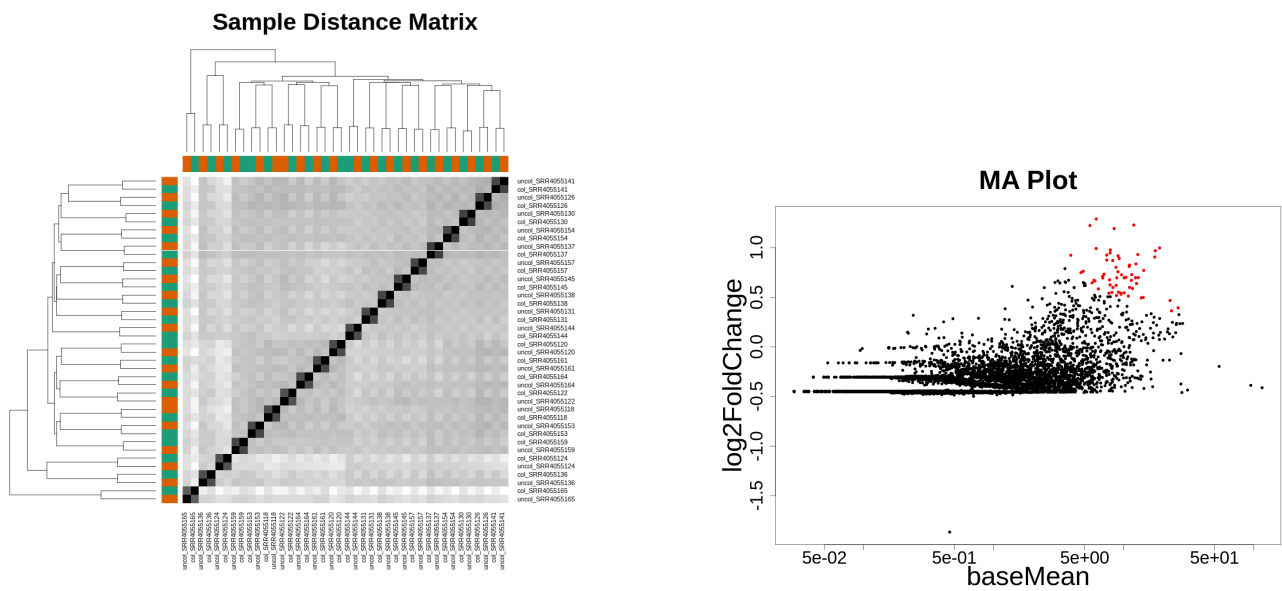

**Figure S 4.** DESeq2 analysis of 20 mouse RNA-seq biological replicates (single cells) from the La Manno data set in which UMI-read clusters were collapsed (col.) or not collapsed (uncol.) into single observations. Left: pairwise distance matrix. Right: MA plot with  $\log_2$  fold *apparent* expression differences on the Y axis and mean expression level on the X. Genes having adjusted P values of less than 0.05 have red dots.

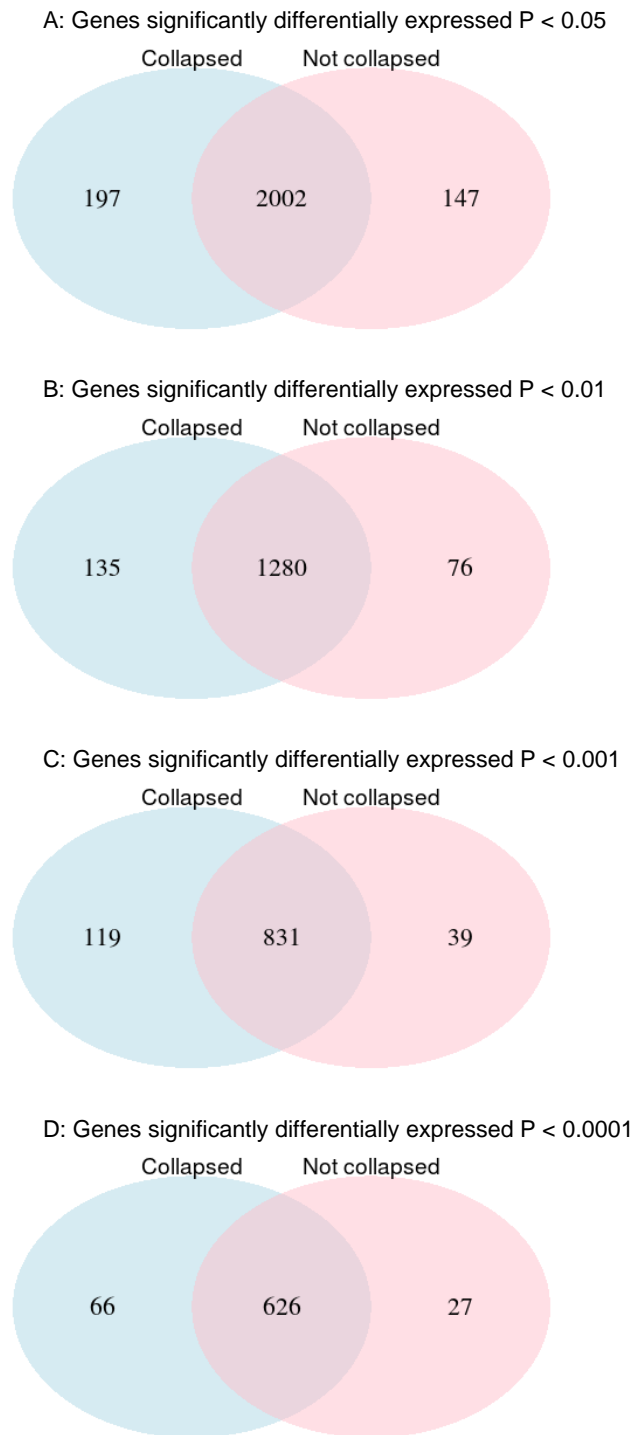

**Figure S 5.** Intersections and differences between sets of genes differentially expressed at four levels of statistical significance in the Jaitin data set when UMI-gene clusters are collapsed or not collapsed into single observations.

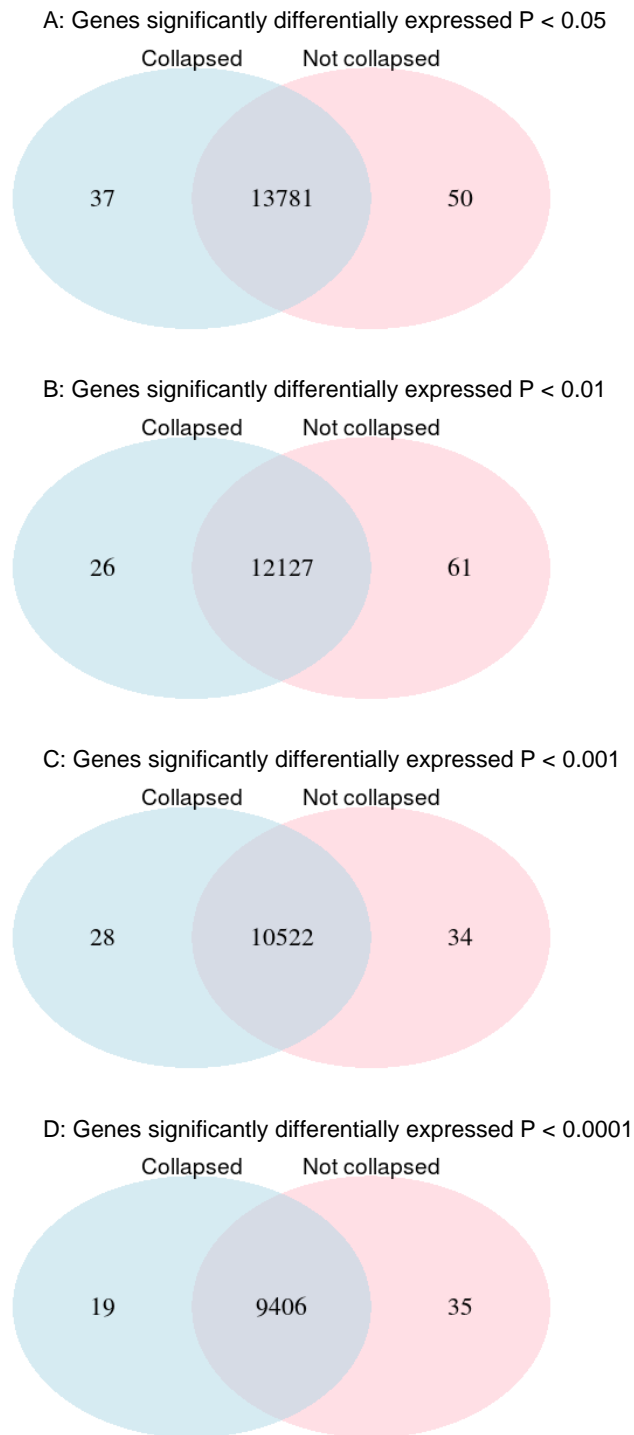

**Figure S 6.** Intersections and differences between sets of genes differentially expressed at four levels of statistical significance in the Nikaido data set when UMI-gene clusters are collapsed or not collapsed into single observations.



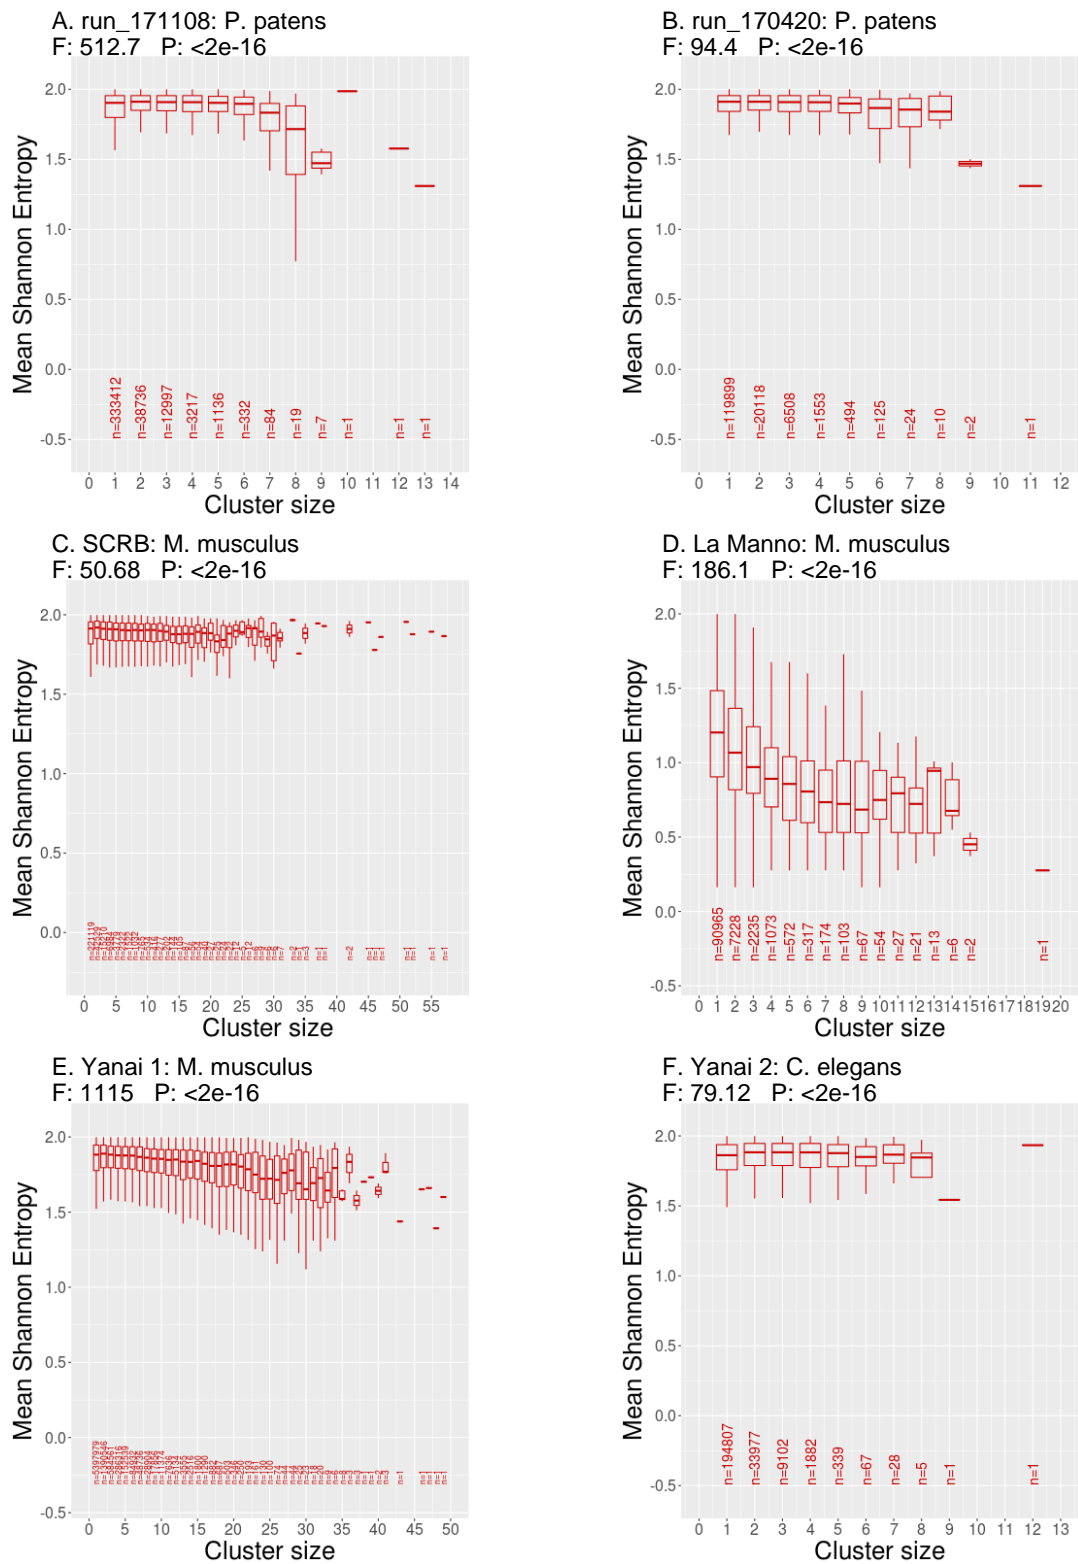

**Figure S 7.** Shannon Entropies plotted as a function of cluster size for the six data sets.

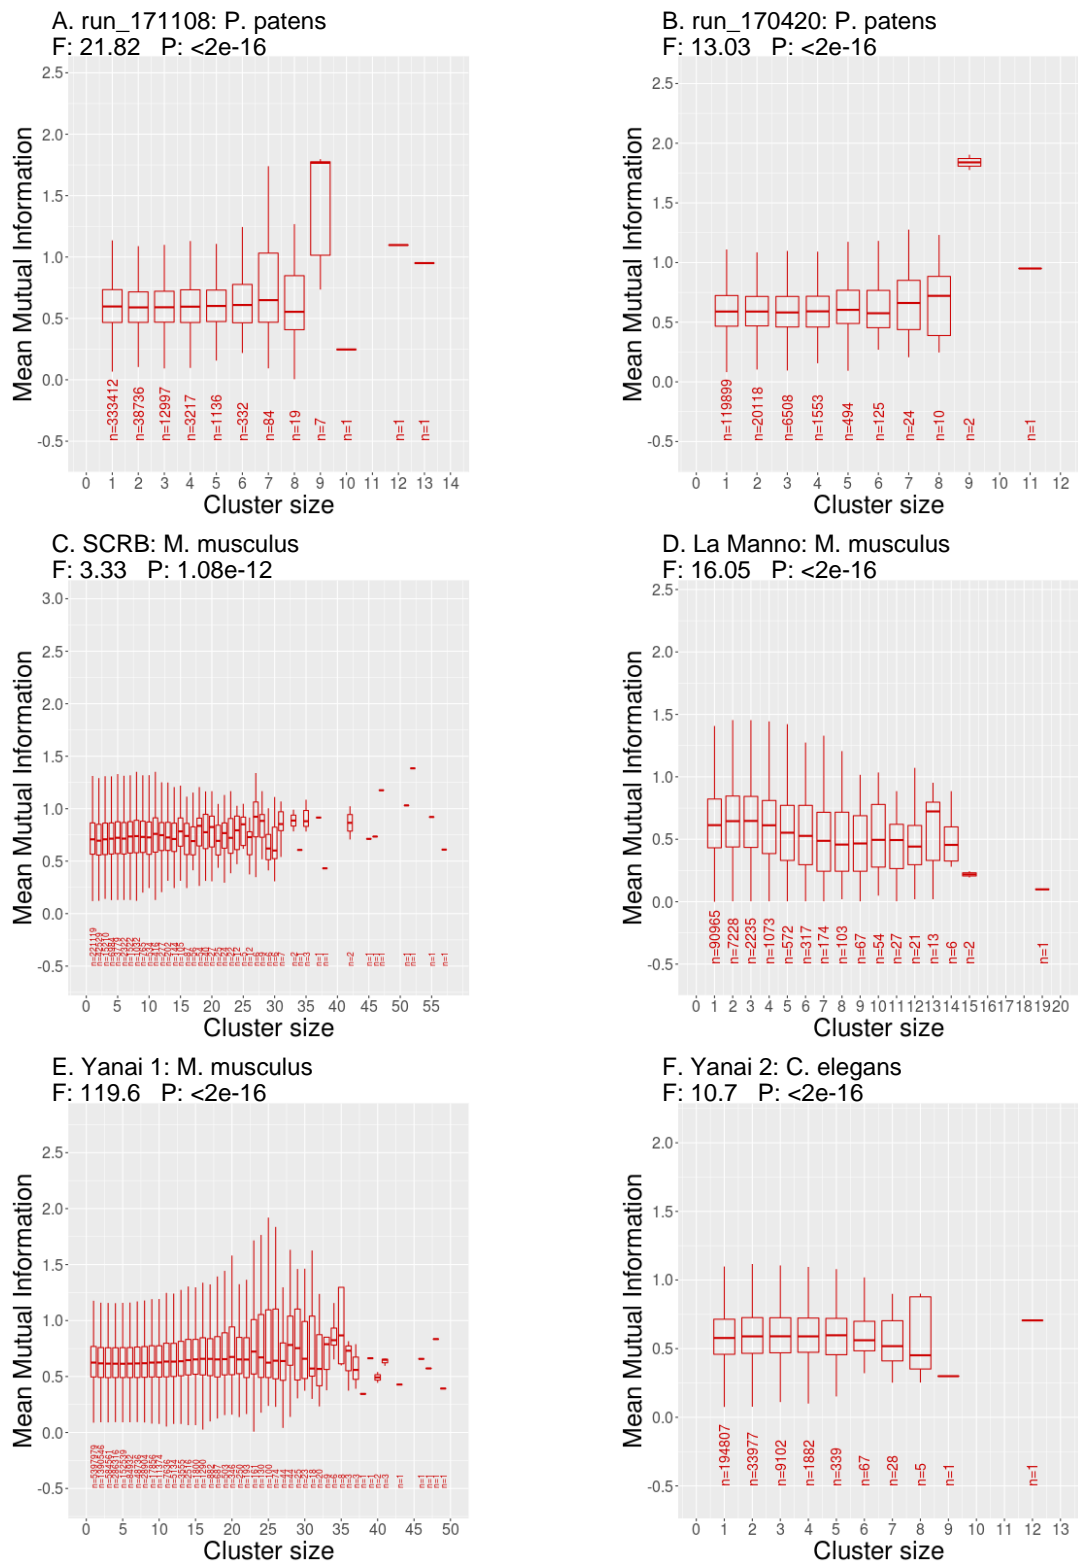

**Figure S 8.** Mutual Information as a function of cluster size for the six data sets.

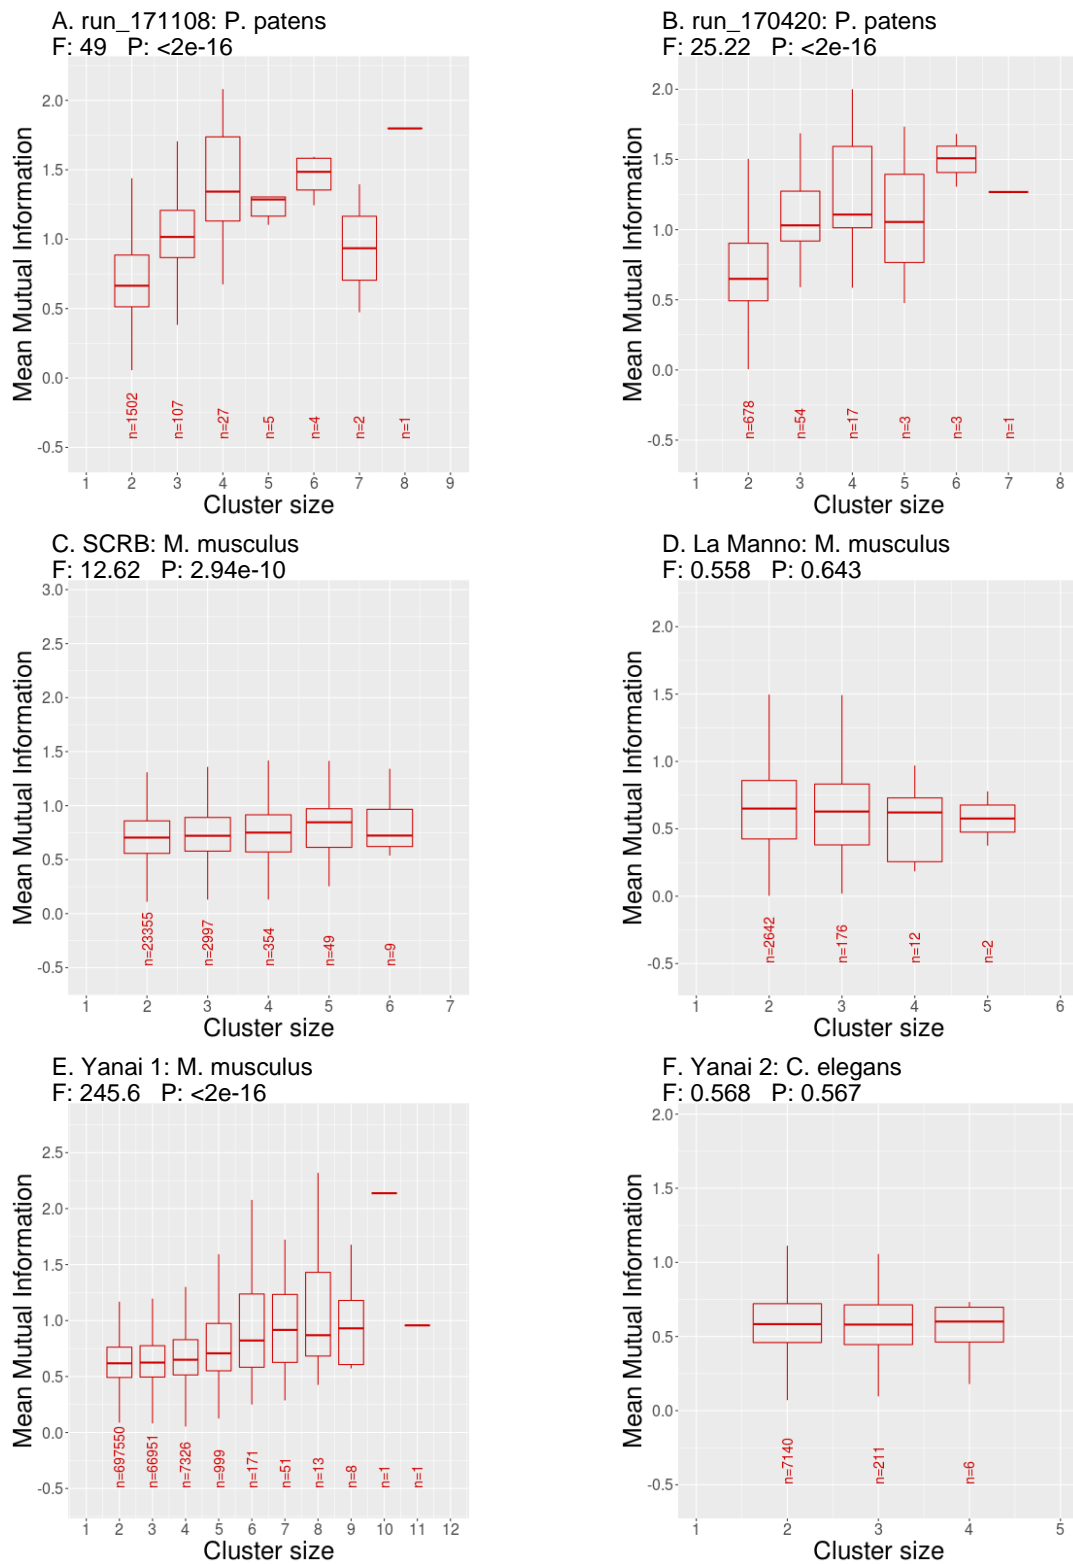

**Figure S 9.** Mutual Information as a function of cluster size for the six data sets, for reads showing shift sizes of strictly 2.

ACTGACACATTTTTACAGACACAGATCCACACAGAC  
ATATATATATATATATATATGCACACACAGAAGTGTAT  
AGCAATAATCTAGTGGTTTCTGATTGAAACAAGTGT  
GAGAGAGAGAGAGAGAGAGAGAGATTGGTGTGGTGTG  
AAGAAATCTCTCCCTCTCTCTCTCTCTCTCTCTCTC  
TCTCTCTCTCTCTCTCGTAGTAGTACTCTGAATTTG  
GAGAGAGAGAGAGAGTGTGTGTGAGTGTGTGTGTG  
CTCTCTCTCTCTCTCTCTCTCTCAGTTTTGGTTGAT  
TACAACTCGGGATCTTCACACACACACACACACAC  
CTCTCTCTCTCTCTCTCGTAGTAGTACTCTGAATTT  
CTACATCCGAACACACACACACACTCACACTAACAC  
GAGAGAGAGAGAGAGCGAGAGAGAGAGAGAGGGAGG  
TCTCTCTCTCTCTCTCCACCTCAACCGATTGTTGTG  
TGCTACGATGCAGCAACCGGTACACACACACACTCT  
CTGTCTCTGTGTATCACACACTCTCTCTCTCTCTCT  
CTGTCTCCTTCTCTCTCTCTCTCTCTCTCTCTCTCT  
AGAGAGAGAGAGGCAACGTCGTGATCTGGTCAGGTT  
AGAGAGAGAGAGAGAGAGAGTGTGTGTGAGTGTGTG  
AGCAACCGGTACACACACACACTCTCAGTGTGCAAG  
CTCTCTCTCTCTCTCGTAGTAGTACTCTGAATTTGT  
ATGCAGCAACCGGTACACACACACACTCTCACTGTG  
CGGCGCACAGTGCATCAAGAATCTCTCTCTCTCTCT  
CAAGCGCGAGAGAGCGAGAGAGAGAGAGAGAGAGAG  
CTCTCTCTCTCTCTCTCGTAGTAGTACTCTGAATTT  
GGACGGGGACAGAGAGAGAGAGAGTGGCATATCCTC  
AGAGAGAGAGAGAGAGTGTGTGTGAGTGTGTGTGT  
TGTCTCTGCAGTGTGTGTGTGTGTGAAAATGAAGCT  
GGAGAGAGAGAGAGAGAGAGAGGCAACGTCGTGATC  
AGAGAGAGAGTGTGTGTGAGTGTGAGAGATTGAGAGAG  
GTGTGTGTATGTGTGAGAGAGAGAGAGAGCAAGAGA  
TCTCTCTCTCTCTCTCTCTCAGTTTTGGTTGATGCC  
ACTGAGACACCAAGAGAGAGAGAGAGAGAGAGAGGCC  
CAAGCGCGAGAGAGCGAGAGAGAGAGAGAGAGAGAG  
ATCTCTCTCTCTCTCGTAGTAGTACTCTGAATTTGT  
TGTGTATCACACACTCTCTCTCTCTCTCTCTCGCTC  
TACCACCAGGACTTGCAAACACACACACACACACAC  
GAGAGAGAGAGAGAGAGAGAGAGCGAGAACGGAGGG  
CTCTCTCTCTCTCGTAGTAGTACTCTGAATTTGTGT  
AGGAGGAAAACGGGAGAGAGAGAGAGAGAGAGAGAC

**Table S 2.** Run\_171108 reads found in clusters greater than size 3 with shifts of strictly 2.

GATGCAGCAACCGGTACACACACACACTCTCACTGT  
AATCGACCGCAGCGGAGCGAGAGAGAGAGAGTCAAAGT  
AGAGAGAGAGAGAGAGAGAGAGAGAGAGAGATTGGTGT  
CTCCTGTTCGGCTCTACGAAGAGAGAGAGAGAGAGAC  
GGTGTGTGTGTGTGTGTGTGTGTTTGGCTTGCTTGCATG  
TGGCATGGCTTCGCCCCCAAAAAAAAAAGAGAGAG  
AGCAATAATCTAGTTGTTTCTGATTGAAACAAGTGT  
GAGAGAGAGAGAGAGAGAGAGAGAGATTGGTGTGTTGTG  
GAGAGAGAGAGAGAGAGAGAGAGAGAGAGAGAGAGTGGTG  
TGCAGCAACCGGTACACACACACACTCTCACTGTGC  
AATCTCTCCCTCTCTCTCTCTCTCTCTCTCTCTCTCTCTC  
GATGCAGCAACCGGTACACACACACACTCTCACTGT  
ATGCAGCAACCGGTACACACACACACTCCCACTGTG  
TGGAGGCAGAGTGAGAGAGAGAGCTAATGAGACTAG  
CACAATATCACGAGCACACACACACACACACACACA  
GTCGCTCACACACACACACTTCACTTCGATCGCGGC  
ATTGTGTGTGTGTGTGTGTGTGTTGCGCCGCCCTCACC  
CTTCACACACACACACACACACAGCAACAACACTGCAG  
GATGCAGCAACCGGTACACACACACACTCTCACTGT  
GCTACGATGCAGCAACCGGTACACACACACACTCTC  
CTCTCTCTCTCTCTCTCTCTCTCAGTTTTGGTTGAT  
AGAGAGAGAGAGAGAGAGAGAGAGAGAGAGAGAGTGGTGT  
AGGTATGCCGAGAGAGAGAGAGAGAGAGAGAGAGAAAC  
GATGCAGCAACCGGTACACACACACACTCTCACTGT  
ATGGCTTCGCCCCCAAAAAAAAAAGAGAGAGAGAG  
GACAACTCGGGATCTTCACACACACACACACACAC  
AGAGAGAGAGAGAGAGAGAGAGAGATGGGGCAGGGT  
CTCTCTCTCTCGTAGTAGTACTCTGAATTTGTGTGC  
CTCTCTCTCTCTCTCTCTCGTAGTAGTACTCTGAAT  
GAGAGAGAGAGAGAGAGCGAGAGAGAGAGAGAGGGGA  
TGTGTGTGGTTTCGGAGGAGGTGAACAAGCTTGAGAA  
GAAGGTATGCCGAGAGAGAGAGAGAGAGAGAGAGAAAC  
TGCTACGATGCAGCAACCGGTACACACACACACTCT  
ACATTATAAAAAATAAAAAATAAAAAAAAAAAAAACA  
TCGTAGTAGTACTCTGAATTTGTGTGCTTTGCGGAG  
CTGTCTCTGTGTATCACACACTCTCTCTCTCTCTCT  
AGAGAGAGAGAGGCAACGTCGTGATCTGGTCAGGTT  
AGAGAGAGAGAGAGAGAGAGAGAGTGTGTGTGAGTGTG  
CCGGCTCGATCGTGAATTTTCAGAACTCTCTCTC  
CTCTCTCTCTCTCTCGTAGTAGCACTCTGAATTTGT

**Table S 3.** Run\_170420 reads found in clusters greater than size 1 with shifts of strictly 2.

GAGGGTGACAAGCACACCCTNAGCAAGAAGGAG  
AAAGGCTTTTGGNCTTTTCAATCACTTGCTGAT  
CACCATGACAACCTCAGTTCTNAAATTCAACTAT  
AGGCTCATCACANTTGGATGCAAGCACACAAAG  
AGCACACCCTGAGCAAGAAGNAGCTGAAGGAGC  
TTATCTATGACTCTGACTGGAACCCCCATAATGA  
GACCAAGTATGTGGAAGCCAAGGACTGTCTGAAC  
ATTGTTGACTGTCCATAGTCCACGCAGAGTTAC  
GACGTTATTCACAGGACGATTTCGAAAAGTCCATT  
GCAATTCTCCTGNCTCAGCCTCCTGAGTAGGTG  
CAGCAACCATGAGTGGTTCATGATGGGAAGTG  
AAATGAATATTATCCCTAATACCTGCCACCCCA  
CTTGCTCGCGTTGATCTTGGATCCCTCTGCGAA  
GTATGAAATTGGTAGTGGATCATCAAATATAAT  
ATCTATCTATCTATCTATATCTATCTATGCATCT  
CTGTCAGTATTAAGGCCAGCAGCCTGTTGATA  
GTACATAGTTGACTGACAAANTTCTCTACCATC  
CAGAGGGACTCGGAGATCATGCAGCAGAAGCAG  
GTTATCGACTACATTGATAGTAAATTTGAGGAC  
GAGACACTTGGACGTCACATGTGAAGCCTACGA  
CACATCTGCTGGNAGGTGGACAGAGAGGCCAGG  
GTTAGTGACAGATTGCTAAACTTGGCTTTAGAC  
AGTTAGCTGCAGTAATGGTAGTCTTCCCTCTGG  
AATACTTGAACANTTTGCCAGTAATGTGACAC  
ACCTGAAGGTGAAGGGGAATGTGTTCAAAAACA  
TGCAATCAGTGAAGAAAAACNCCGTGAGATATT  
ACCTGAAGGTGAAGGGGAATGTGTTCAAAAACA  
GTGTATGTAGGAGTGAATATAAAAAGGACTTCAT  
GTACCTGAAGGTGAAGGGGAATGTGTTCAAAA  
GTACCTGAAGGTGAAGGGGAATGTGTTCAAAA  
GTATAATAATTTGAGATGTTNNTAATTATTTG  
CTCTGATTGGCAACATGTTANCTTTGAAGTGGA  
TTGTTATGTGAGAAATGTTACTGGGGAAATAGA  
TCACCTTCGTGAATACCAAGACCTGCTCAATGTT  
GTATGGGAAACAATCTTTTGTAATGCAAAGCT  
GTTTTTGTGTGTGTGTGCTGNCGCTTGTGAC  
CACTGTGTCTCCGACATTTNCCTTTTCTTTT  
TTCCAAGCAATTTTGATGGAATCGACATCCACA  
TAAATCAATCTGAATGGTATCATTACCTTGATG  
TTCAATCTGTATGTCTGCGAGCTTCACCTTCTGT

**Table S 4.** SCRIB reads found in clusters greater than size 4 with shifts of strictly 2.

AAAAAAAAAAAAAAAAAAAAAAAAATCGGGGGCTGTTTTTT  
AAAAAGCGTGTTTTTTTTTTTTTTTTTTTTTTTTTTTTTT  
AAAAAAAAAAAAAAAAAAAAAAAAACAGCCGGGGTTTTTTTT  
AACCCCTCCATTTTTTTTTTTTTTTTTTTTTTTTTTTTT  
AAAAAAAAAAAAAAAAAAAAAAAAAAAAAAAAAGTGGTTTT  
AAAAAAAAAAAAAAAAAAAAAAAAACGCGGGTGCCCCCTT  
AAAAAAAAAAAAAAAAAAAAAAAAACGCGTTCCTTTAAAA  
AAAGCCCTCTCTTTTTTTTTTTTTTTTTTTTTTTTTTT  
AAAAAAAAAAAAAAAAAAAAAAAAACCTTCTTTTAAACAATT  
AAAAAAAAAAAAAAAAAAAAAAAAACTAGGGGGGCCCCC  
AAAAAGAAAAATCTTTTTTTTTTTTTTTTTTTTTTTTT  
AAACCGACCTTTTTTTTTTTTTTTTTTTTTTTTTTTTT  
AAAAAAAAAAAAAAAAAAAAAAAAAGCGGGGGCCCCCTTT  
AAAAAAAAAAAAAAAAAAAAAAAAACGGTTTTCTTATACAT  
AAAAAAAAAAAAAAAAAAAAAAAAACCTCTCTTTAAAAAATC  
AAAAAAAAAAAAAAAAAAAAAAAAACCGTGGCTGGCTGTTTT  
AAAAAAAAAAAAAAAAAAAAAAAAAGGGCTTTTTTTTAAAA  
GAACAGCCTGTTTTTTTTTTTTTTTTTTTTTTTTTTTT  
AAGACACAGGTTTTTTTTTTTTTTTTTTTTTTTTTTTT  
AAAAAAAAGTGTTTTTTTTTTTTTTTTTTTTTTTTTTT  
AAAAAAGCCCCCGATGTTTTTTTTTTTTTTTTTTTTTT  
AGGGCGGGTTTTTTTTTTTTTTTTTTTTTTTTTTTTTT  
TTTTTTTTTTTTTAAGATTTTTTTTTTTTTTTTTTTTT  
AAAAAAAAAAAAAAAAAAAAAAAAACGACCGGTGTTTTTT  
AAAAGAAAGTGGTTTTTTTTTTTTTTTTTTTTTTTTTT  
AAAGCGGTTTTTTTTTTTTTTTTTTTTTTTTTTTTTT  
AAGACAGGGCTTTTTTTTTTTTTTTTTTTTTTTTTTT  
AAAAAGAGCACCATTTTTTTTTTTTTTTTTTTTTTTTT  
AAAAAAAAAAAAAAAAAAAAAAAAAAGCGAGGGGGGC  
CCCGTAGTTTTTTTTTTTTTTTTTTTTTTTTTTTTTT  
AAAAAAAAAAAAAAAAAAAAAAAAAAAAAAAAATGCTTGCAT  
AAAAAAAAAAAAAAAAAAAAAAAAAAAAAAAAACAGGTGGGGGT  
AAAAAGCTAGTTTTTTTTTTTTTTTTTTTTTTTTTTTT  
CCAAGTGTTTTTTTTTTTTTTTTTTTTTTTTTTTTTTT  
GCCCCCTCTTTTTTTTTTTTTTTTTTTTTTTCTTTTTTT  
AAAAAAAAAAAAAAAAAAAAAAAAAAAAAAAAACTTTCTTTT  
ACAGCCGCATTTTTTTTTTTTTTTTTTTTTTTTTTTTT  
AGGGGTATTTTTTTTTTTTTTTTTTTTTTTTTTTTTTT  
CCCCCCTTTCTTTTTTTTTTTTTTTTTTTTTTTTTTT  
AAAAAAAAAAAAAAAAAAAAAAAAAAAAAAAAACGTCGG

**Table S 5.** La Manno reads found in clusters greater than size 2 with shifts of strictly 2.

AGTGTTACAAATGATGGGCTGAGGATGAGGGCGG  
GGAAGAAAGGACATTGGCGTGAGGACAGTGGGGAG  
GTGTGTGTGTGTGTGAGAGAGAATATGTATGTGCG  
CTGGGTTCTCTGCTGTTCTTCTGTGTGTGCGTGTG  
GTGTGTGTAGTGTGTGTGGTGTATGCATGTGTGTA  
TTGCTGGTGGGCCGGAGTGATGTGTTATGGAGGGA  
GGCACAGGTGCGTGAGGCCCTGAGGAGTGGAAAAGA  
CCTGTTCCCAAACCTCCTCCACACATGCCAACGC  
CACACACACACACACACACATGTTAAGTTAAAAATT  
TTTTTCTTCTCTGTCTGTATACCTCTGTGTGGGTG  
GTGTGTGTATTGTTGTTGCAGTTTTCCCTTTGCAT  
GTGTGTGTGTGTAATGGTATAGATGTGGATAAAG  
CACACACACACACACACAATTTATTATCTCTGTGA  
GTGTGTGTGTGTGTGTGTGTGGACTGAGGCTTTTC  
GTTACAGTTTCAGCTGGTAGGGTTTTTGTGTGTG  
TGTATGTAAATTTCAAACCTGTGTGTGTGTGTG  
TGAGTCTTAGGAAGGTGTGTGTGTGTGTGGGTG  
TTAACTTACATCACTCCACACACACACACACAC  
GACACACACACACACACAGCAACACATATATAAGA  
GCGCTGGGGTGGAGTGCTAGCATTTCAGAAAAAAA  
CACACACACACAATTTATTATCTCTGTGAGGAGAG  
TGATCTGACAGGTGCTAACATAGTTACACACACAC  
TTTTTTGTTTGTGTTTCTCTGTGTCTGTGTGTG  
TTTCATCCCACCAGGAACTGTTTTACACACACAC  
CACACATTTTTTAAGAAGAGGAATCTGGGCTTTCA  
TTGGCCTCATACTCACCATGTACAAACACACACAC  
CACACACACACACACACAGGGTCTGGCTCTGTATC  
CACACCATGTACTCATAGACCTAAGTGCACCCTCC  
CACGCACACACACATACAGTTGCAAACATGCCAC  
ATTCCTTTTGTGTATGTAAATTTCAAACCCGTGTG  
TGTGTGTGATGTGTGTGTGTGTGTGATATGTGCGA  
CTTCTAAGATGTATTTGTGTGTGTGTGTGTGTG  
CACACGCGCATAACACACACACCCAAACGTACACAC  
TCTTTTAAAAAATGTTTCCTTATTGTGTGCGTGTG  
ATGAGTCCCTCTCCTGATTATATGTCGTGTGTGTG  
CACACACACACACACACAATTTATTATCTCTGT  
CACACACACACACACACGCATACACATACGTGTAC  
CACACACACACACACATTTCTAAATATAACCTGTA  
GTGTGTGTGTGTGGGGGGGAGATTTTCTGGATTGG  
GTGTGTGTGTGTGTGTATACCAGTGCATTAATAA

**Table S 6.** Yanai1 reads found in clusters greater than size 6 with shifts of strictly 2.



TTGAGACCGGTTTTACATTACAGCAATCATTGAAC  
TTTCTTGGCAAATTGCCAATTCCATACTTTTTTCAG  
GCAAAAGACACAATTAAACGACCGGGCTTGGGGGA  
TGTGCTTTTTTCTACAACTTTATACATATAACTC  
ATGTACCAGCTCATAAGCATACTGTTTCATGGCTAG  
CATTGTCGCCATCAACAAGGATCCTGATGCACCAA  
GGTTGACAAGCAAGACAAGAAAAAGAAGAAGCGCG  
TATGGTACAACATGAAACATTGATCGCATCGAGAC  
TAAAAACCACCAAAAAACCGCGGAGCGACTTGACGC  
CGTGATTACCCGCTGAACTTAAGCATATCATTTAG  
AAAACAATCAATTAACCCGAGAGAATAGGAGAGAC  
AAGTCTCCCGAATATTTTTATTGATTTATTGTTTA  
CCCTCCATGAGATTGTTTTATGTATGAGTAGATA  
TCCAACATTTGGATCCTCGGTGACTTGTGTGGCG  
TTCCAATCATTTTTCCAATATCCCAAAGCTGGACT  
AAGCCCATGTCGTCGTCGGATTCTCTCTTTGGCTC  
ATTATGCTTTTTCAAAAAAATCGATCGTTGGTTCTT  
TTCCGTTGAATTTGACGTGATCTCTGCTTGTTCC  
CCTCTCCAAAAATCCAAGTTTGTGGAGCGAAATGC  
GTGACGCTCGCTGAAGTTGTTGTTGTTGACGGTCT  
TAGAATTACGAGGAGACGAAAAGGCACGACAACCC  
TAAATACATTCCAGATTCAACTTGTAGTATTATAT  
GCTCAGTCGTGATTACCCGCTGAACTTAAGCATAT  
TTGGGTTTTCCATTAGAAGTATGAAATTTCCATTCA  
TGAATAAAATAGTTATACCGGGTACGGCGTTTTTG  
ATTTTTTGAAGCGAAAAAACTAGGGAAAAATATAG  
ATGTCCTCGATCTTTTTTTTTAACGCAAAATTTTTT  
CAGCAATTGAAAAAAACAAACAAAGAAAAAATAAA  
TGTTGAATCCGGCGTTCTTGGCCAAGCGACGGACT  
CCATCATCACGGACCACCACCACCATACTACG  
AGCATCTGCCCCAGCTGCCGTTGAAGCCGCTCCAG  
ACACCGTTATGGTGCTTCCCTCCGTAAGATGGCCA  
ACTCGGATGGGGAGTTGATAATGGAACACCATATT  
AAACGTCTCCGAGCTCAAATGCACTATCAAATCT  
ATCTCAACCTGAACTCAGTCGTGATTACCCGCTGA  
CCAAAAATCCTTTAAAAACTGTTATGTTAATATGT  
CTCTCAACCTGAACTCAGTCGTGATTACCCGCTGA  
TCTCTCCAGCTTCTCCCTCAGCGTATCCGTCGACG  
ATAATCCATTCCATAATCTGCTTCACGGAATAACT  
TTCTGTCAATTTGATCGCTTTAACGTCGGATACTT

**Table S 7.** Yanai2 reads found in clusters greater than size 1 with shifts of strictly 2.

| Gene ID   | Gene Name | Gene ID   | Gene Name     |
|-----------|-----------|-----------|---------------|
| gene15014 | Rtkn      | gene37995 | Arhgap31      |
| gene40749 | Usp14     | gene29487 | Gm9548        |
| gene32668 | Gm3604    | gene3375  | Ralgps1       |
| gene12461 | Lrrc8c    | gene34036 | Pbrm1         |
| gene13363 | Slc29a4   | gene32584 | Ntrk2         |
| gene37400 | Clec16a   | gene1057  | Cab39         |
| gene109   | Tram1     | gene1513  | Nckap5        |
| gene4514  | Lrrc4c    | gene27131 | Thg11         |
| gene35044 | Ints9     | gene17187 | Lipe          |
| gene16653 | Slc27a5   | gene9456  | Focad         |
| gene33282 | Cdk7      | gene22590 | Ntm           |
| gene31570 | Arid4b    | gene26390 | R3hdm2        |
| gene1248  | Kif1a     | gene37153 | Slc4a8        |
| gene27317 | Gm30366   | gene43021 | Smc3          |
| gene25570 | Rnf126    | gene11952 | Gabrb1        |
| gene2796  | Gm13219   | gene23508 | Adam10        |
| gene6164  | Arfgap1   | gene30724 | Foxn3         |
| gene3319  | Lamc3     | gene21163 | Arhgap10      |
| gene1742  | Nek7      | gene17186 | 4732471J01Rik |
| gene11721 | Gm16223   | gene35684 | Plcxd3        |
| gene204   | Kcnq5     | gene25168 | Mcu           |
| gene25858 | Chpt1     | gene29317 | Eif4a3        |
| gene13943 | Podxl     | gene13869 | Snd1          |
| gene26601 | Tug1      | gene30450 | Synj2bp       |
| gene11162 | Abcb4     | gene16205 | Tmtc1         |
| gene25938 | Gm32749   | gene33218 | Arhgef28      |
| gene6764  | Gm32177   | gene19435 | Scnn1g        |
| gene32038 | Cdkal1    | gene7999  | Mettl14       |
| gene25857 | Sycp3     | gene12037 | C530008M17Rik |
| gene21868 | Nudt7     | gene25083 | Dcbld1        |

**Table S 8.** Mouse genes in the Figure S4 data having apparent overexpression with adjusted  $P < 0.05$

| Accession  | Tissue            | Sample Barcode | Run    | Sequencing Lane |
|------------|-------------------|----------------|--------|-----------------|
| SRR7295917 | Whole Plant       | ACATCG         | 171108 | 1               |
| SRR7295918 | Whole Plant       | ATTGGC         | 171108 | 1               |
| SRR7295919 | Whole Plant       | CACTGT         | 171108 | 1               |
| SRR7295920 | Whole Plant       | GATCTG         | 171108 | 1               |
| SRR7295921 | Whole Plant       | TACAAG         | 171108 | 1               |
| SRR7295922 | Whole Plant       | TGGTCA         | 171108 | 1               |
| SRR7295923 | Whole Plant       | ATTGGC         | 171108 | 2               |
| SRR7295924 | Whole Plant       | CACTGT         | 171108 | 2               |
| SRR7295925 | Whole Plant       | GATCTG         | 171108 | 2               |
| SRR7295926 | Whole Plant       | TACAAG         | 171108 | 2               |
| SRR7295931 | Whole Plant       | TGGTCA         | 171108 | 2               |
| SRR7295932 | Whole Plant       | ACATCG         | 171108 | 3               |
| SRR7295933 | Whole Plant       | ATTGGC         | 171108 | 3               |
| SRR7295934 | Whole Plant       | CACTGT         | 171108 | 3               |
| SRR7295927 | Whole Plant       | GATCTG         | 171108 | 3               |
| SRR7295928 | Whole Plant       | TACAAG         | 171108 | 3               |
| SRR7295929 | Whole Plant       | TGGTCA         | 171108 | 3               |
| SRR7295930 | Single Protoplast | ACATCG         | 171108 | 4               |
| SRR7295935 | Single Protoplast | ATTGGC         | 171108 | 4               |
| SRR7295936 | Single Protoplast | CACTGT         | 171108 | 4               |
| SRR7295908 | Single Protoplast | GATCTG         | 171108 | 4               |
| SRR7295907 | Single Protoplast | TGGTCA         | 171108 | 4               |
| SRR7295910 | Whole Plant       | ACATCG         | 171108 | 6               |
| SRR7295909 | Whole Plant       | ATTGGC         | 171108 | 6               |
| SRR7295912 | Whole Plant       | CACTGT         | 171108 | 6               |
| SRR7295911 | Whole Plant       | GATCTG         | 171108 | 6               |
| SRR7295914 | Whole Plant       | TACAAG         | 171108 | 6               |
| SRR7295913 | Whole Plant       | TGGTCA         | 171108 | 6               |
| SRR7295916 | Whole Plant       | ACATCG         | 171108 | 7               |
| SRR7295915 | Whole Plant       | CACTGT         | 171108 | 7               |
| SRR7295939 | Whole Plant       | TGGTCA         | 171108 | 7               |
| SRR7295940 | Single Protoplast | ACATCG         | 171108 | 8               |
| SRR7295937 | Whole Plant       | CACTGT         | 171108 | 8               |
| SRR7295938 | Single Protoplast | GATCTG         | 171108 | 8               |
| SRR7295905 | Single Protoplast | TACAAG         | 171108 | 8               |
| SRR7295906 | Single Protoplast | TGGTCA         | 171108 | 8               |
| SRR7295941 | Whole Plant       | NA             | 170420 | 4               |

**Table S 9.** SRA Study (SRP150352) Information for run\_171108 and run\_170420

## Supplementary References

1. Barnett, D. W., Garrison, E. K., Quinlan, A. R., Strömberg, M. P. & Marth, G. T. BamTools: a C++ API and toolkit for analyzing and managing BAM files. *Bioinforma. (Oxford, England)* **27**, 1691–1692 (2011). DOI 10.1093/bioinformatics/btr174.
2. Quinlan, A. R. & Hall, I. M. BEDTools: a flexible suite of utilities for comparing genomic features. *Bioinforma.* **26**, 841–842 (2010). URL <https://academic.oup.com/bioinformatics/article/26/6/841/244688>. DOI 10.1093/bioinformatics/btq033.
3. Wu, T. D. & Nacu, S. Fast and SNP-tolerant detection of complex variants and splicing in short reads. *Bioinforma. (Oxford, England)* **26**, 873–881 (2010). DOI 10.1093/bioinformatics/btq057.
4. Kim, D., Langmead, B. & Salzberg, S. L. HISAT: a fast spliced aligner with low memory requirements. *Nat. Methods* **12**, 357–360 (2015). URL <https://www.nature.com/articles/nmeth.3317>. DOI 10.1038/nmeth.3317.
5. Tange, O. Gnu parallel - the command-line power tool. *login: The USENIX Mag.* **36**, 42–47 (2011). URL <http://www.gnu.org/s/parallel>.
6. Li, H. *et al.* The Sequence Alignment/Map format and SAMtools. *Bioinforma. (Oxford, England)* **25**, 2078–2079 (2009). DOI 10.1093/bioinformatics/btp352.
7. Dobin, A. *et al.* STAR: ultrafast universal RNA-seq aligner. *Bioinforma. (Oxford, England)* **29**, 15–21 (2013). DOI 10.1093/bioinformatics/bts635.
8. Danecek, P. *et al.* The variant call format and VCFtools. *Bioinforma.* **27**, 2156–2158 (2011). URL <https://academic.oup.com/bioinformatics/article/27/15/2156/402296>. DOI 10.1093/bioinformatics/btr330.
9. R Core Team. *R: A Language and Environment for Statistical Computing*. R Foundation for Statistical Computing, Vienna, Austria (2017). URL <https://www.R-project.org/>.
10. Love, M. I., Huber, W. & Anders, S. Moderated estimation of fold change and dispersion for RNA-seq data with DESeq2. *Genome Biol.* **15**, 550 (2014). URL <https://doi.org/10.1186/s13059-014-0550-8>. DOI 10.1186/s13059-014-0550-8.
11. Wickham, H. *ggplot2: Elegant Graphics for Data Analysis* (Springer-Verlag New York, 2009). URL <http://ggplot2.org>.
12. Wickham, H., Francois, R., Henry, L. & Müller, K. *dplyr: A Grammar of Data Manipulation* (2017). URL <https://CRAN.R-project.org/package=dplyr>. R package version 0.7.4.
